# Supplementary material for: Electrochemically engineered hierarchical flower-like Ag nanostructures within Al2O3 honeycomb microchannel periodic arrays for ultra-sensitive SERS detection
Source: Royal Society of Chemistry journal article supplement (doi:10.1039/d4ce01266f), 2025-01-01
Supplement: d4ce01266f1.pdf [file d4ce01266f1.pdf]

## Supporting Information

# **Electrochemically Engineered Hierarchical Flower-like Ag Nanostructures within Al<sub>2</sub>O<sub>3</sub> Honeycomb Microchannel Periodic Arrays for Ultra-Sensitive SERS Detection**

Penghui Wei<sup>1</sup>, Jiajia Song<sup>1</sup>, Haibin Tang<sup>2</sup>, Qinglin Shi<sup>3</sup>, Yongqing Ma<sup>1</sup>, Ganhong Zheng<sup>1</sup>,  
Meiling Wang<sup>1</sup>, Sajid Imran,<sup>4</sup> Muhammad Usman Amin<sup>1,\*</sup>, Yilin Lu<sup>5,\*</sup>, Chuhong Zhu<sup>1,\*</sup>

<sup>1</sup>School of Materials Science and Engineering, Anhui University, Hefei, Anhui 230601, China

<sup>2</sup>Key Laboratory of Materials Physics, and Anhui Key Laboratory of Nanomaterials and Nanotechnology, Institute of Solid-State Physics, Chinese Academy of Sciences, Hefei 230031, People's Republic of China

<sup>3</sup>ERA Piping (Anhui) Co., Ltd., Xuancheng 242299, People's Republic of China

<sup>4</sup>School of science and engineering, The Chinese university of HongKong, Shenzhen 518172, China

<sup>5</sup>Information Materials and Intelligent Sensing Laboratory of Anhui Province, Institute of Physical Science and Information Technology, Anhui University, Hefei 230601, China

\*Corresponding authors. E-mail addresses: usmanamin@ahu.edu.cn (M. U. Amin);  
chzhu@ahu.edu.cn (C. Zhu)

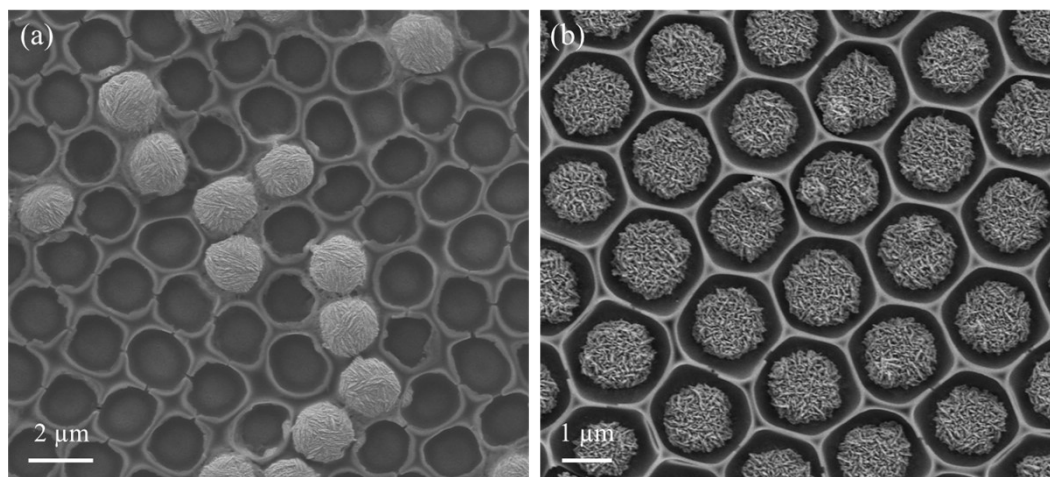

**Fig. S1** SEM images of Ag nanostructures grown inside of  $\text{Al}_2\text{O}_3$  HMPAs on ITO surface (a) without Au sputtering and (b) with Au sputtering.

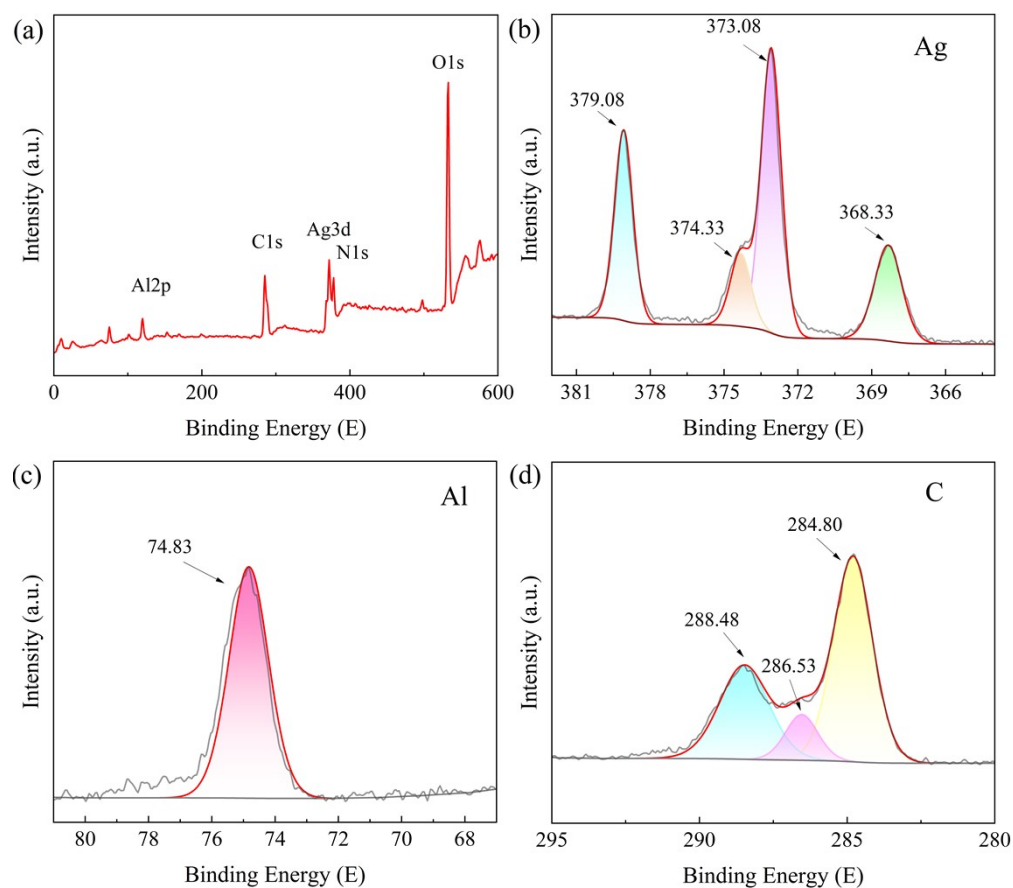

**Fig. S2** XPS spectra of flower-like Ag nanostructures synthesized within  $\text{Al}_2\text{O}_3$  HMPAs: (a) Survey scan of as-prepared sample confirming the presence Ag and  $\text{Al}_2\text{O}_3$ , (b) high resolution XPS spectrum of indicating metallic Ag, (c) high resolution XPS spectrum corresponding to  $\text{Al}_2\text{O}_3$ , and (d) high resolution  $\text{C}1s$  spectrum showing adventitious carbon and oxidized species.

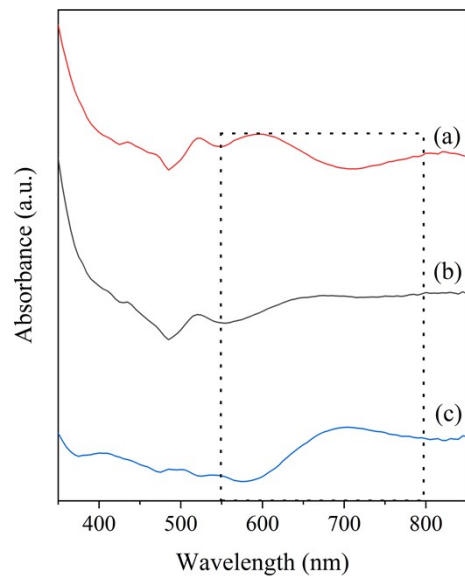

**Fig. S3** UV-vis absorption spectra of  $\text{Al}_2\text{O}_3$  HMPAs on ITO glass slide (a) before and (b) after electrodeposition of hierarchical flower-like Ag nanostructures, and (c) the difference of spectra before and after growing the hierarchical flower-like Ag nanostructures into the HMPAs that was obtained by directly subtracting the curve a from curve b.

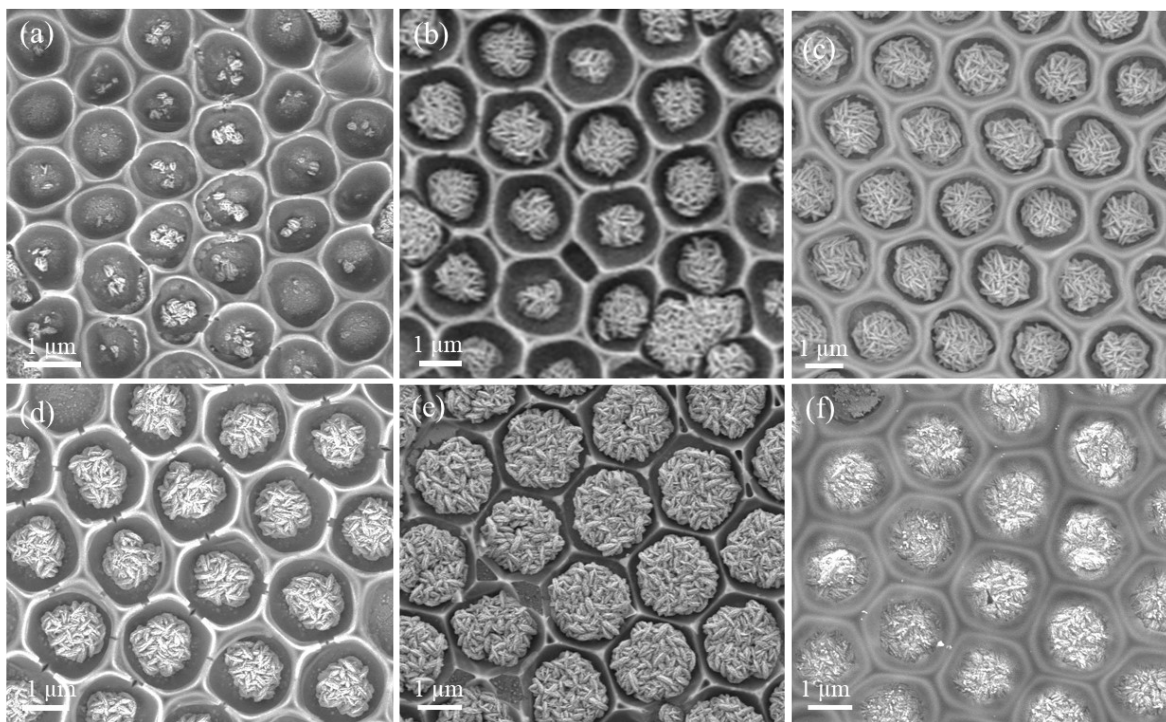

**Fig. S4** SEM images of Ag nanostructures grown inside the Al<sub>2</sub>O<sub>3</sub> HPMAs under different concentrations of AgNO<sub>3</sub>: (a) 1 mM, (b) 5 mM, (c) 10 mM, (d) 15 mM, (e) 20 mM, and (f) 30 mM.

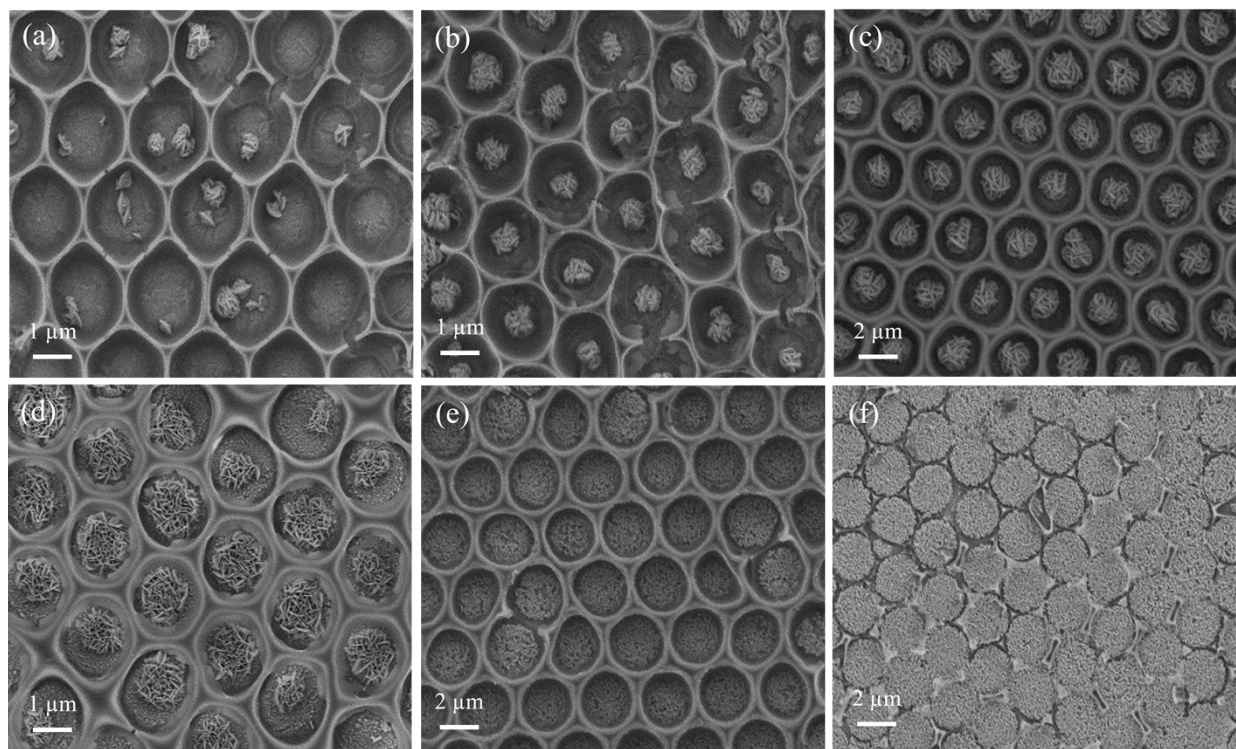

**Fig. S5** SEM images of Ag nanostructures grown inside the Al<sub>2</sub>O<sub>3</sub> bowls by varying the current density from (a) 25  $\mu\text{A}/\text{cm}^2$ , (b) 50  $\mu\text{A}/\text{cm}^2$ , (c) 100  $\mu\text{A}/\text{cm}^2$ , (d) 150  $\mu\text{A}/\text{cm}^2$ , (e) 200  $\mu\text{A}/\text{cm}^2$  and (f) 250  $\mu\text{A}/\text{cm}^2$ .

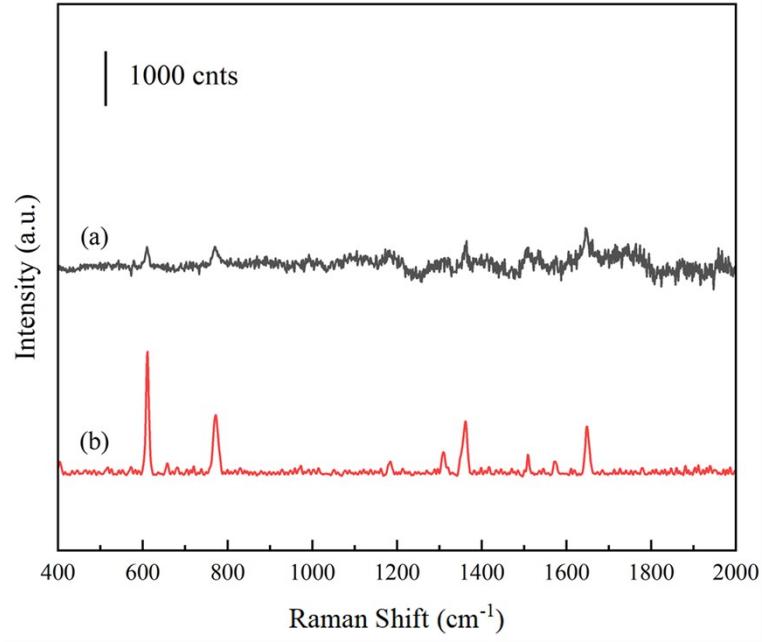

**Fig. S6** The comparison between the Raman signal of R-6G ( $10^{-3}$  M) on a glass slide (spectrum a) and the SERS signal of R-6G ( $10^{-10}$  M) utilizing the hierarchical flower-like Ag nanostructures (spectrum b).

The SERS enhancement factor calculated for the fabricated hierarchical flower-like Ag nanostructures was  $6.99 \times 10^7$ . The EF was determined using the standard equation:

$$EF = \frac{I_{SERS} \times C_0}{I_0 \times C_{SERS}}$$

where  $C_0$  and  $I_0$  represents the concentration and intensity of the normal Raman signal, while  $C_{SERS}$  and  $I_{SERS}$  corresponds to the concentration and intensity for the SERS signal, respectively.

**Table S1**

The comparison of present study of hierarchical flowerlike Ag nanostructures with previous studies reported in the literature.

| Sample                                                         | Detected<br>Analyte | Enhancement<br>Factor/LOD                     | Value of R <sup>2</sup> | Reference        |
|----------------------------------------------------------------|---------------------|-----------------------------------------------|-------------------------|------------------|
| Ag NPs                                                         | R-6G                | $6.7 \times 10^6$<br>Not reported             | 0.977                   | [1]              |
| 2D Cs <sub>2</sub> AgBiBr <sub>6</sub><br>nanoflakes           | R-6G                | $1.37 \times 10^7$<br>$1 \times 10^{-10}$ M   | 0.97                    | [2]              |
| MoS <sub>2</sub><br>nanobelts                                  | R-6G                | $1.1 \times 10^4$<br>$10^{-7}$ M              | Not reported            | [3]              |
| WO <sub>3-x</sub><br>nanoplatelets                             | R-6G                | $5.5 \times 10^7$<br>Not reported             | Not reported            | [4]              |
| W <sub>18</sub> O <sub>49</sub> /monolayer<br>MoS <sub>2</sub> | R-6G                | $3.45 \times 10^7$<br>$1 \times 10^{-10}$ M   | 0.9915                  | [5]              |
| Ag nanoflowers                                                 | R-6G                | $6.99 \times 10^7$<br>$9.3 \times 10^{-11}$ M | 0.997                   | <i>This work</i> |



## References:

- S1. J. Du, K. Li, Y. Lu and P. Wang, *J. Mater. Chem. C*, 2025, DOI: 10.1039/d5tc00211g.
- S2. R. Chahal, S. Ghosal, J. Ghosh and P. K. Giri, *Nanoscale*, 2025, DOI: 10.1039/d5nr00437c.
- S3. C. Diao, C. Li, Y. Sun, X. Wang, M. Gao, X. Zhang, D. Li, Y. Li, G. Xu and J. Yu, *Mater. Today Nano*, 2025, **29**.
- S4. M. V. Simas, G. A. Davis, S. Hati, J. Pu, J. V. Goodpaster and R. Sardar, *ACS Appl. Mater. Interfaces*, 2025, **17**, 11309-11324.
- S5. M. Li, X. Fan, Y. Gao and T. Qiu, *J. Phys. Chem. Lett.*, 2019, **10**, 4038-4044.
